# Supplementary material
Source: publisher figshare collection journal article supplement (https://acs.figshare.com/ndownloader/files/4575448)

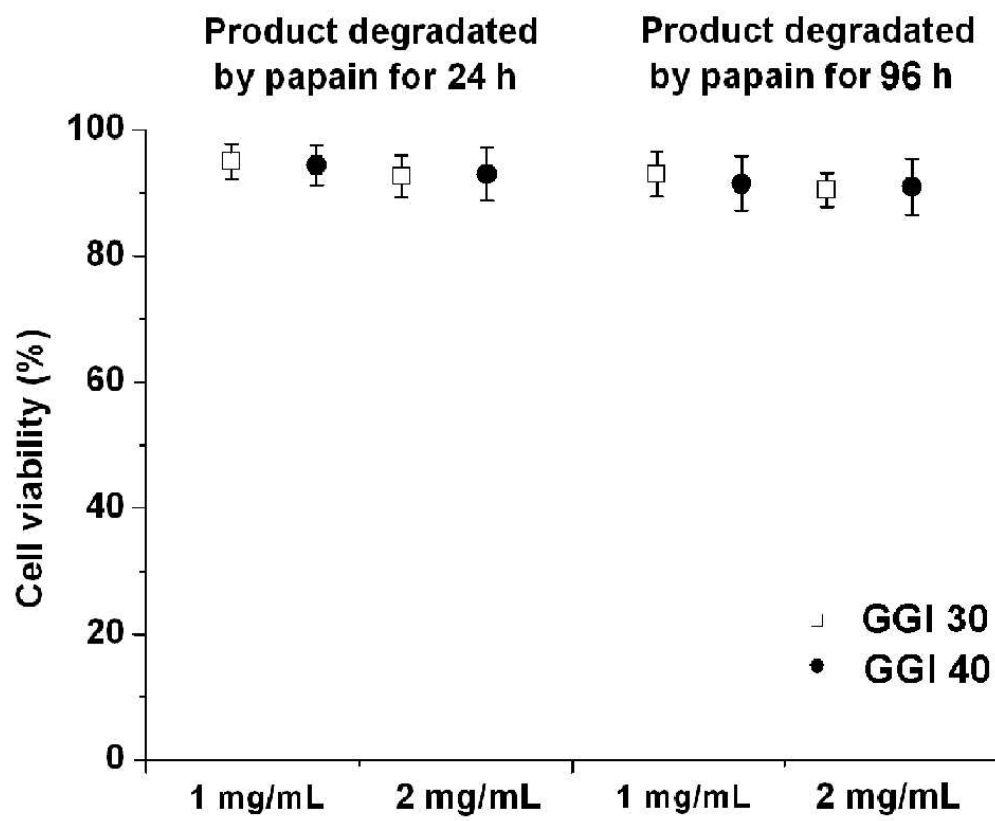

80x66mm (300 x 300 DPI)

Supplement: Supplementary file 1 [file 4575448]
